# Supplementary material for: A theoretical foundation for state-transition cohort models in health decision analysis
Source: PubMed Central journal article supplement (PMC6289421; doi:10.1371/journal.pone.0205543), 2018-12-11
Supplement: pone.0205543.s001.pdf [file pone.0205543.s001.pdf]

## S1 Appendix. Mathematical derivations

**Transition probability.** In this section, we show the derivation for the probability of transitioning from  $S_k$  to state  $S_l$  in time step  $\tau$ , which is given by:

$$P[S_k \rightarrow S_l \in (t, t + \tau] | n_k, t] = \nu_{kl}(\mathbf{n} - s_{kl}, t) = n_k c_{kl} \tau + o(\tau) \quad (1)$$

The probability of a *particular* transition  $k \rightarrow l$  ( $R_{kl}$ ) in a small time step  $\tau$  is postulated to be linear in time:  $c_{kl} \tau + o(\tau)$ . This postulate is conceptually a first-order Taylor approximation to an instantaneous transition probability. The transition rate constant,  $c_{kl}$ , is interpreted as the derivative of the transition probability at time  $\tau = 0$ . We also restrict the number of allowable transitions in  $\tau$  to one transition. If the number of individuals in  $S_k$  at time  $t$  is equal to  $n_k$ , then any of these  $n_k$ , assumed to be *indistinguishable*, individuals is at risk of transitioning. Since individuals are indistinguishable, each individual transition can be considered as a Bernoulli trial with a probability of success of  $c_{kl} \tau + o(\tau)$ . The probability of only one individual transitioning is equal to:  $(c_{kl} \tau + o(\tau))(1 - c_{kl} \tau + o(\tau))^{n_k - 1}$ . Since there are  $n_k$  ways of this transition to occur, we have:

$$P[S_k \rightarrow S_l \in (t, t + \tau] | n_k, t] = \binom{n_k}{1} (c_{kl} \tau + o(\tau))(1 - (c_{kl} \tau + o(\tau)))^{n_k - 1} \quad (2)$$

Equation  $n_k c_{kl}(t) \tau + o(\tau)$  is then recovered as the  $\tau$  terms of higher order are collected as  $o(\tau)$  after expanding the binomial term in Eq 2.

**Master equation.** In principle, the master equation is based on the idea of mass conservation. First, the probability of observing a particular state-configuration at time  $t + \tau$  is a function of the probabilities of the adjacent state-configurations at time  $t$  and the transitions between the corresponding probabilities of the state-configurations occurring in time step  $\tau$ . The adjacent state configurations are defined as state-configurations with differences of +1 and -1 in two of the state counts, compared to the state-configuration of interest. The transitions between these corresponding probabilities are governed by the propensity function ( $\nu$ ). Mathematically, the first step translates to:

$$\begin{aligned} P(\mathbf{n}, t + \tau) &= \sum_{k=1}^s \sum_{l=1, l \neq k}^s \nu_{kl}(\mathbf{n} - s_{kl}, t) P(\mathbf{n} - s_{kl}, t) + \sum_{k=1}^s \sum_{l=1, l \neq k}^s (1 - \nu_{kl}(\mathbf{n}, t)) P(\mathbf{n}, t) \\ &= \sum_{k=1}^s \sum_{l=1, l \neq k}^s c_{kl}(t) (n_k + 1) \tau P(\mathbf{n} - s_{kl}, t) + \sum_{k=1}^s \sum_{l=1, l \neq k}^s (1 - c_{kl}(t) n_k \tau) P(\mathbf{n}, t) \end{aligned} \quad (3)$$

Rearranging Eq 3 and dividing it by  $\tau$  yields:

$$\begin{aligned} \frac{P(\mathbf{n}, t + \tau) - P(\mathbf{n}, t)}{\tau} &= \sum_{k=1}^s \sum_{l=1, l \neq k}^s c_{kl}(t) (n_k + 1) P(\mathbf{n} - s_{kl}, t) \\ &\quad - \sum_{k=1}^s \sum_{l=1, l \neq k}^s c_{kl}(t) n_k P(\mathbf{n}, t) \end{aligned} \quad (4)$$

The master equation is then established after taking the limit  $\tau \rightarrow 0$ .

**Generating function method.** A probability generating function (PGF) for a vector  $\mathbf{x} = (x_1 \ x_2 \ \dots \ x_s)$  is defined by:

$$G(\mathbf{x}, t) = \sum_{\mathbf{n}} x_1^{n_1} x_2^{n_2} \dots x_s^{n_s} P(\mathbf{n}, t) \quad (5)$$

where  $\sum_{\mathbf{n}} = \sum_{n_1} \dots \sum_{n_s}$ . Differentiating  $G(\mathbf{x}, t)$  with respect to  $t$  and assuming that the series is uniformly convergent, we obtain:

$$\frac{\partial}{\partial t} G(\mathbf{x}, t) = \sum_{\mathbf{n}} x_1^{n_1} x_2^{n_2} \dots x_s^{n_s} \frac{\partial}{\partial t} P(\mathbf{n}, t)$$

or

$$\frac{\partial}{\partial t} G(\mathbf{x}, t) = \sum_{\mathbf{n}} x_1^{n_1} x_2^{n_2} \dots x_s^{n_s} \sum_{k=1}^s \sum_{l=1}^s (\nu_{kl}(\mathbf{n} - s_{kl}, t) P(\mathbf{n} - s_{kl}, t) - \nu_{kl}(\mathbf{n}, t) P(\mathbf{n}, t)) \quad (6)$$

Eq 6 can be simplified by (1) recognizing the following identity (e.g., for  $x_1$ ):

$$\sum_{\mathbf{n}} n_1 x_1^{n_1-1} x_2^{n_2} \dots x_s^{n_s} P(\mathbf{n}, t) = x_1 \frac{\partial}{\partial x_1} G(\mathbf{x}, t),$$

(2) using the definition of PGF (Eq 5), and (3) rearranging the summation index to obtain the following first-order linear partial differential equation (PDE):

$$\frac{\partial}{\partial t} G(\mathbf{x}, t) = \sum_{k=1}^s \sum_{l=1, l \neq k}^s c_{kl} (x_l - x_k) \frac{\partial}{\partial x_k} G(\mathbf{x}, t), \quad (7)$$

with an initial condition:  $G(\mathbf{x}, 0) = \sum_{\mathbf{n}} x_1^{n_1} x_2^{n_2} \dots x_s^{n_s} P(\mathbf{n}, 0)$  The PDE by solved by using the method of characteristics. The characteristics equations are:  $\frac{d\mathbf{x}(\xi)}{d\xi} = \mathbf{v}$  where  $\mathbf{v} = (v_1 v_2 \dots v_s)$  and  $v_i = \sum_{l=1, l \neq i}^s c_{ik} (x_l - x_i)$ . Putting  $\beta(s) = G(\mathbf{x}(\xi), t - \xi)$ , we have:

$$\frac{d\beta(\xi)}{d\xi} = \mathbf{v} \cdot \nabla G(\mathbf{x}(\xi), t - \xi) - \frac{\partial}{\partial t} G(\mathbf{x}(\xi), t - s\xi) \quad (8)$$

from which a general solution can be deduced:  $G(\mathbf{x}(0), t) = G(\mathbf{x}(t), 0) = g(\mathbf{x}(t))$ . The system of the characteristics equations can be written as:

$$\frac{d\mathbf{x}}{d\xi} = A\mathbf{x} \quad (9)$$

where  $A$  is an  $s \times s$ ,  $(c_{kl})_{k,l \in \{1,2,\dots,s\}}$ , matrix with elements of the form:  $A_{kl} = c_{kl} - \gamma_k \delta_{kl}$  with  $\gamma_k = \sum_{l=1}^s c_{kl}$  and  $\delta_{kl}$  is the usual Kronecker delta. Therefore, the solution of 9 takes the form:

$$\mathbf{x}(t) = B\mathbf{x}(0) \quad (10)$$

where  $B(t) = \exp At = \sum_{k=1}^{\infty} \frac{(At)^k}{k!}$ , i.e. the matrix exponential. Given,  $G(\mathbf{x}, 0)$ ,  $G(\mathbf{x}(0), t) = g(B\mathbf{x}(0))$ . The solution of the PGF is then:

$$G(\mathbf{x}, t) = \sum_{\mathbf{n}} \prod_{i=1}^s \left( \sum_{k=1}^s B_{ik}(t) x_k \right)^{n_i} P(\mathbf{n}, 0) \quad (11)$$

If we assumed all  $n_0$  individuals start in state  $S_1$ , i.e.  $x_1^{n_0}$ , the solution of the PGF is then:

$$G(\mathbf{x}, t) = \left( \sum_{k=1}^s B_{ik}(t)x_k \right)^{n_0} \quad (12)$$

The probability density function of the state-configuration can be recovered from Eq 12 by using the definition of the PGF. We introduce a vector:  $\mathbf{z}_i = [z_{i1} \ z_{i2} \ \dots \ z_{is}]$  where  $i \in \{1, 2, \dots, s\}$  and the norm  $\|\mathbf{z}_i\| = z_{i1} + z_{i2} + \dots + z_{is}$ . Using the multinomial theorem:

$$(x_1 + x_2 + \dots + x_s)^{n_i} = \sum_{\|\mathbf{z}_i\|=n_i} \frac{z_i!}{z_{i1}!z_{i2}! \dots z_{is}!} x_1^{z_{i1}} x_2^{z_{i2}} \dots x_s^{z_{is}},$$

we write

$$\left( \sum_{k=1}^s B_{ik}(t)x_k \right)^{n_i} = \sum_{\substack{\mathbf{z}_i \\ \|\mathbf{z}_i\|=n_i}} n_i! \prod_{k=1}^s \frac{B_{ik}(t)}{z_{ik}!} x_k^{z_{ik}} \quad (13)$$

Therefore, we have:

$$\begin{aligned} G(\mathbf{x}, t) &= \sum_{\mathbf{n}} \prod_{i=1}^s \left( \sum_{k=1}^s B_{ik}(t)x_k \right)^{n_i} P(\mathbf{n}, 0) \\ &= \sum_{\mathbf{n}} \prod_{i=1}^s \left( \sum_{\substack{\mathbf{z}_i \\ \|\mathbf{z}_i\|=n_i}} n_i! \prod_{k=1}^s \frac{B_{ik}(t)}{z_{ik}!} x_k^{z_{ik}} \right) P(\mathbf{n}, 0) \\ &= \sum_{\mathbf{n}} \sum_{\substack{\mathbf{z}_1 \dots \mathbf{z}_s \\ \|\mathbf{z}_1\|=n_1 \\ \vdots \\ \|\mathbf{z}_s\|=n_s}} \prod_{i=1}^s \left( \sum_{\substack{\mathbf{z}_i \\ \|\mathbf{z}_i\|=n_i}} n_i! \prod_{k=1}^s \frac{B_{ik}(t)}{z_{ik}!} \right) \prod_{k=1}^s x_k^{\sum_{i=1}^s z_{ik}} P(n_1, n_2, \dots, n_s, 0) \\ &= \sum_{\mathbf{n}} \sum_{\substack{\mathbf{z}_1 \dots \mathbf{z}_s \\ \|\mathbf{z}_1\|=n_1 \\ \vdots \\ \|\mathbf{z}_s\|=n_s}} \prod_{i=1}^s \left( \sum_{\substack{\mathbf{z}_i \\ \|\mathbf{z}_i\|=n_i}} \|\mathbf{z}_i\|! \prod_{k=1}^s \frac{B_{ik}(t)}{z_{ik}!} \right) \prod_{k=1}^s x_k^{\sum_{i=1}^s z_{ik}} P(\|\mathbf{z}_1\|, \|\mathbf{z}_2\|, \dots, \|\mathbf{z}_s\|, 0) \\ &= \sum_{\mathbf{n}} \sum_{\substack{\mathbf{z}_1 \dots \mathbf{z}_s \\ \mathbf{z}_1 + \mathbf{z}_2 + \dots + \mathbf{z}_s = \mathbf{n}}} \prod_{i=1}^s \left( \|\mathbf{z}_i\|! \prod_{k=1}^s \frac{B_{ik}(t)}{z_{ik}!} x_k^{z_{ik}} \right) \prod_{k=1}^s x_k^{n_k} P(\|\mathbf{z}_1\|, \|\mathbf{z}_2\|, \dots, \|\mathbf{z}_s\|, 0) \end{aligned}$$

If we rearrange the last line, we have:

$$\begin{aligned} G(\mathbf{x}, t) &= \sum_{\mathbf{n}} x_1^{n_1} x_2^{n_2} \dots x_s^{n_s} \\ &\quad \left[ \sum_{\substack{\mathbf{z}_1 \dots \mathbf{z}_s \\ \mathbf{z}_1 + \mathbf{z}_2 + \dots + \mathbf{z}_s = \mathbf{n}}} \prod_{i=1}^s \left( \|\mathbf{z}_i\|! \prod_{k=1}^s \frac{B_{ik}(t)}{z_{ik}!} x_k^{z_{ik}} \right) P(\|\mathbf{z}_1\|, \|\mathbf{z}_2\|, \dots, \|\mathbf{z}_s\|, 0) \right] \quad (14) \end{aligned}$$

Therefore the solution to the master equation is obtained after equating the coefficients in Eq 5 with Eq 11:

$$P(\mathbf{n}, t) = \sum_{\substack{\mathbf{z}_1 \dots \mathbf{z}_s \\ \mathbf{z}_1 + \mathbf{z}_2 + \dots + \mathbf{z}_s = \mathbf{n}}} \prod_{i=1}^s \left( \|\mathbf{z}_i\|! \prod_{k=1}^s \frac{B_{ik}(t)}{z_{ik}!} x_k^{z_{ik}} \right) P(\mathbf{n}, 0) \quad (15)$$

If we assumed all  $n_0$  individuals start in state  $S_1$ , i.e.  $x_1^{n_0}$ , the solution takes the form of a multinomial distribution:

$$P(\mathbf{n}, t) = n_0! \prod_{m=1}^s \frac{B_{1m}^{n_m}}{n_m!} \quad (16)$$

**Mean and variance of the master equation.** The first moment of the master equation can be computed by differentiating Eq 12 and set all  $x$  equal to 1, e.g. the mean of the number of individuals in state  $S_i$ , given all  $n_0$  individuals start in state  $S_1$ , is equal to:

$$\phi(t) = n_0 B_{1i}(t) \quad (17)$$

For an arbitrary initial distribution, the mean of the number of individuals in state  $S_i$  is given by:

$$\phi_i^a(t) = \sum_{\mathbf{n}} \sum_{k=1}^s n_k B_{ki}(t) P(\mathbf{n}, t) \quad (18)$$

The variance of the master equation can be derived by using the following relationship:

$$V_i(t) = \left. \frac{\partial^2}{\partial x_i^2} G(\mathbf{x}, t) \right|_{\mathbf{x}=1} + \phi_i(t) - \phi_i(t)^2 \quad (19)$$

The variance of the number of individuals in state  $S_i$ , given all  $n_0$  individuals start in state  $S_1$ , is equal to:

$$V_i(t) = n_0 B_{1i}(t) (1 - B_{1i}(t)) \quad (20)$$

The variance of the number of individuals in state  $S_i$  for an arbitrary initial distribution is given by:

$$V_i^a(t) = \sum_{\mathbf{n}} \left[ \sum_{k=1}^s n_k B_{ki}(t) \left( (n_k - 1) B_{ki}(t) + \sum_{l=1, l \neq k}^s n_l B_{li}(t) + 1 \right) \right] P(\mathbf{n}, t) + \phi_i^a(t)^2 \quad (21)$$
